# Supplementary material for: A dynamic ensemble model for short-term forecasting in pandemic situations
Source: bioRxiv or medRxiv preprint supplement (doi:10.1101/2024.03.08.24303963), 2024-03-12
Supplement: Supplementary file [file media-1.zip]

## S3 Appendix

In the following we are displaying the regional results and aggregated results that were not included in the manuscript.

### S3.1 Base Models versus Baseline Ensembles Results

| Geography | LR               | LSTM             | XG              | RF              | ARIMA           | Mean            | Median          | Prev.-Best      |
|-----------|------------------|------------------|-----------------|-----------------|-----------------|-----------------|-----------------|-----------------|
| DE        | 21.07<br>(2.27)  | 38.1<br>(3.76)   | 27.9<br>(1.71)  | 24.54<br>(1.36) | 19.15<br>(1.14) | 23.04<br>(1.3)  | 22.51<br>(1.15) | 17.37<br>(1.04) |
| DE.BB     | 29.02<br>(2.55)  | 40.62<br>(9.78)  | 32.43<br>(1.94) | 28.89<br>(1.64) | 27.87<br>(1.84) | 28.39<br>(2.55) | 27.14<br>(1.55) | 26.02<br>(1.65) |
| DE.BE     | 27.34<br>(2.75)  | 32.5<br>(4.56)   | 28.93<br>(1.62) | 27.29<br>(1.36) | 24.58<br>(1.47) | 25.0<br>(1.66)  | 25.07<br>(1.34) | 23.58<br>(1.68) |
| DE.BW     | 24.17<br>(1.57)  | 29.32<br>(1.73)  | 31.57<br>(1.99) | 28.3<br>(1.71)  | 24.18<br>(1.43) | 24.5<br>(1.39)  | 26.38<br>(1.46) | 23.51<br>(1.57) |
| DE.BY     | 22.71<br>(1.53)  | 29.52<br>(1.61)  | 30.08<br>(1.81) | 27.75<br>(1.53) | 22.8<br>(1.33)  | 23.86<br>(1.25) | 25.12<br>(1.34) | 21.33<br>(1.35) |
| DE.HB     | 32.03<br>(2.69)  | 60.25<br>(19.64) | 32.85<br>(2.4)  | 28.98<br>(1.84) | 25.98<br>(1.52) | 32.03<br>(4.06) | 27.07<br>(1.44) | 27.29<br>(1.78) |
| DE.HE     | 24.37<br>(2.44)  | 30.6<br>(2.18)   | 29.91<br>(1.74) | 27.65<br>(1.49) | 23.07<br>(1.24) | 24.24<br>(1.39) | 25.86<br>(1.4)  | 21.47<br>(1.65) |
| DE.HH     | 27.6<br>(3.23)   | 36.18<br>(7.15)  | 27.74<br>(1.97) | 25.62<br>(1.64) | 21.37<br>(1.42) | 24.87<br>(1.95) | 23.28<br>(1.41) | 27.67<br>(6.0)  |
| DE.MV     | 35.76<br>(4.84)  | 46.2<br>(12.82)  | 30.97<br>(2.1)  | 27.68<br>(1.89) | 25.35<br>(1.52) | 29.07<br>(2.99) | 26.71<br>(1.74) | 28.76<br>(4.43) |
| DE.NI     | 24.79<br>(2.43)  | 27.81<br>(1.7)   | 27.04<br>(1.62) | 25.22<br>(1.4)  | 22.05<br>(1.36) | 22.11<br>(1.27) | 23.47<br>(1.38) | 21.56<br>(1.34) |
| DE.NW     | 29.74<br>(8.29)  | 28.13<br>(1.76)  | 29.73<br>(1.89) | 26.58<br>(1.52) | 21.26<br>(1.1)  | 24.35<br>(2.19) | 24.97<br>(1.44) | 20.91<br>(1.33) |
| DE.RP     | 27.15<br>(1.92)  | 34.38<br>(4.22)  | 32.19<br>(2.08) | 29.51<br>(1.77) | 25.05<br>(1.49) | 26.09<br>(1.72) | 27.01<br>(1.63) | 24.79<br>(1.6)  |
| DE.SH     | 31.57<br>(3.08)  | 32.86<br>(4.53)  | 29.78<br>(1.66) | 27.17<br>(1.35) | 23.6<br>(1.64)  | 25.5<br>(1.65)  | 25.35<br>(1.38) | 25.08<br>(2.58) |
| DE.SL     | 35.54<br>(4.21)  | 61.55<br>(21.01) | 37.35<br>(2.78) | 32.94<br>(2.16) | 27.93<br>(1.85) | 35.6<br>(4.68)  | 30.77<br>(1.93) | 30.06<br>(2.33) |
| DE.SN     | 47.42<br>(18.74) | 36.84<br>(6.56)  | 36.37<br>(2.78) | 31.0<br>(2.14)  | 28.77<br>(1.84) | 32.68<br>(4.64) | 28.32<br>(1.68) | 22.86<br>(1.47) |
| DE.ST     | 32.76<br>(3.73)  | 42.95<br>(11.68) | 34.22<br>(3.06) | 29.04<br>(2.28) | 28.63<br>(2.53) | 29.7<br>(3.19)  | 27.87<br>(2.04) | 28.38<br>(2.87) |
| DE.TH     | 25.55<br>(1.72)  | 47.29<br>(17.87) | 31.79<br>(2.21) | 27.85<br>(1.64) | 26.45<br>(1.71) | 28.3<br>(3.93)  | 25.83<br>(1.57) | 22.72<br>(1.52) |

**Table S3.1.1:** Base models versus baseline ensemble methods for COVID-19 cases in Germany. The performances are given as the mean MAPE and its standard error in parentheses. The regions are given in HASC Codes (<http://www.statoids.com/ihasc.html>)

| Geography | LR              | LSTM             | XG              | RF              | ARIMA           | Mean            | Median          | Prev.-Best      |
|-----------|-----------------|------------------|-----------------|-----------------|-----------------|-----------------|-----------------|-----------------|
| DE        | 12.75<br>(0.77) | 28.95<br>(2.12)  | 20.51<br>(1.39) | 19.17<br>(1.15) | 8.88<br>(0.66)  | 14.97<br>(0.9)  | 15.4<br>(0.98)  | 11.94<br>(1.54) |
| DE.BB     | 33.15<br>(4.18) | 26.85<br>(2.45)  | 29.31<br>(2.14) | 26.72<br>(2.03) | 19.86<br>(1.31) | 23.69<br>(1.81) | 23.05<br>(1.62) | 19.81<br>(1.5)  |
| DE.BE     | 21.96<br>(1.63) | 19.63<br>(2.04)  | 20.98<br>(1.23) | 19.68<br>(1.13) | 14.16<br>(0.93) | 16.44<br>(1.01) | 16.34<br>(1.0)  | 16.09<br>(1.1)  |
| DE.BW     | 17.54<br>(1.24) | 22.24<br>(1.25)  | 26.73<br>(2.54) | 22.41<br>(1.42) | 13.58<br>(0.94) | 18.13<br>(1.11) | 18.99<br>(1.08) | 15.56<br>(0.89) |
| DE.BY     | 16.41<br>(1.08) | 22.14<br>(1.36)  | 24.97<br>(1.81) | 22.07<br>(1.4)  | 11.47<br>(0.61) | 16.89<br>(0.99) | 17.8<br>(1.01)  | 12.55<br>(0.68) |
| DE.HB     | 49.6<br>(12.66) | 60.83<br>(21.57) | 37.83<br>(2.99) | 34.91<br>(2.58) | 25.5<br>(1.99)  | 35.48<br>(5.18) | 28.74<br>(1.82) | 34.81<br>(5.25) |
| DE.HE     | 16.8<br>(1.11)  | 20.84<br>(1.26)  | 23.24<br>(1.56) | 21.89<br>(1.42) | 11.97<br>(0.69) | 16.5<br>(0.97)  | 17.37<br>(0.98) | 13.7<br>(0.85)  |
| DE.HH     | 31.77<br>(3.17) | 27.91<br>(2.55)  | 28.35<br>(2.33) | 26.4<br>(2.19)  | 20.01<br>(1.5)  | 22.91<br>(1.68) | 23.11<br>(1.66) | 19.99<br>(1.17) |
| DE.MV     | 34.03<br>(3.51) | 27.71<br>(2.5)   | 31.76<br>(3.06) | 30.92<br>(3.23) | 24.45<br>(2.33) | 24.38<br>(1.73) | 25.65<br>(1.84) | 23.49<br>(1.87) |
| DE.NI     | 22.03<br>(1.54) | 21.0<br>(1.24)   | 23.35<br>(1.4)  | 21.78<br>(1.32) | 14.99<br>(1.14) | 17.21<br>(1.03) | 18.15<br>(1.08) | 16.14<br>(1.08) |
| DE.NW     | 14.9<br>(0.92)  | 23.85<br>(1.48)  | 21.96<br>(1.55) | 20.08<br>(1.31) | 10.48<br>(0.64) | 15.8<br>(0.95)  | 16.85<br>(1.08) | 12.22<br>(0.75) |
| DE.RP     | 26.81<br>(3.59) | 22.09<br>(1.24)  | 26.54<br>(1.77) | 23.94<br>(1.54) | 17.37<br>(1.25) | 19.44<br>(1.29) | 19.82<br>(1.27) | 18.81<br>(1.38) |
| DE.SH     | 28.87<br>(3.1)  | 27.57<br>(4.39)  | 28.66<br>(3.12) | 27.63<br>(3.11) | 18.99<br>(1.97) | 21.7<br>(2.13)  | 21.92<br>(1.86) | 22.96<br>(2.66) |
| DE.SL     | 40.95<br>(4.66) | 38.26<br>(5.36)  | 37.65<br>(2.54) | 34.16<br>(2.13) | 23.2<br>(1.25)  | 29.39<br>(1.89) | 28.08<br>(1.53) | 34.72<br>(5.07) |
| DE.SN     | 26.3<br>(3.1)   | 25.44<br>(1.83)  | 33.55<br>(4.77) | 28.2<br>(2.62)  | 17.63<br>(1.16) | 21.95<br>(1.46) | 22.16<br>(1.3)  | 21.13<br>(1.43) |
| DE.ST     | 28.89<br>(2.96) | 25.2<br>(2.2)    | 30.4<br>(2.17)  | 27.61<br>(1.78) | 18.81<br>(1.3)  | 22.35<br>(1.4)  | 22.35<br>(1.46) | 21.4<br>(1.65)  |
| DE.TH     | 26.5<br>(2.78)  | 21.36<br>(1.38)  | 26.2<br>(1.61)  | 24.26<br>(1.36) | 19.82<br>(1.45) | 20.04<br>(1.17) | 20.39<br>(1.19) | 19.62<br>(1.18) |

**Table S3.1.2:** Base models versus baseline ensemble methods for COVID-19 hospitalization in Germany. The performances are given as the mean MAPE and its standard error in parentheses. The regions are given in HASC Codes (<http://www.statoids.com/ihasc.html>).

| Geography | LR              | LSTM            | XG              | RF              | ARIMA           | Mean            | Median          | Prev.-Best      |
|-----------|-----------------|-----------------|-----------------|-----------------|-----------------|-----------------|-----------------|-----------------|
| DE        | 19.85<br>(1.27) | 37.55<br>(2.04) | 27.29<br>(1.72) | 24.84<br>(1.39) | 21.17<br>(1.02) | 22.31<br>(1.15) | 23.0<br>(1.19)  | 20.1<br>(1.28)  |
| DE.BB     | 35.74<br>(1.64) | 24.02<br>(3.15) | 26.41<br>(1.92) | 24.54<br>(1.52) | 23.66<br>(1.57) | 27.64<br>(1.31) | 30.48<br>(1.52) | 23.32<br>(1.63) |
| DE.BE     | 40.78<br>(2.84) | 26.75<br>(3.18) | 30.11<br>(2.36) | 26.27<br>(1.89) | 25.06<br>(1.63) | 27.68<br>(1.64) | 30.02<br>(1.53) | 26.28<br>(3.07) |
| DE.BW     | 28.63<br>(1.62) | 28.26<br>(1.81) | 33.38<br>(2.34) | 30.11<br>(1.91) | 28.13<br>(1.64) | 27.48<br>(1.4)  | 30.01<br>(1.54) | 25.17<br>(1.63) |
| DE.BY     | 30.99<br>(1.84) | 29.2<br>(1.95)  | 33.51<br>(2.16) | 30.19<br>(1.81) | 27.63<br>(1.84) | 27.33<br>(1.47) | 29.16<br>(1.52) | 24.24<br>(1.6)  |
| DE.HB     | 46.63<br>(2.01) | 28.59<br>(5.19) | 25.66<br>(1.9)  | 22.97<br>(1.39) | 20.4<br>(1.22)  | 29.82<br>(1.15) | 35.56<br>(1.17) | 26.87<br>(4.63) |
| DE.HE     | 30.87<br>(2.33) | 27.24<br>(1.82) | 32.66<br>(2.16) | 28.69<br>(1.73) | 26.53<br>(1.58) | 25.85<br>(1.3)  | 27.99<br>(1.46) | 26.04<br>(2.22) |
| DE.HH     | 41.65<br>(2.33) | 25.18<br>(2.41) | 28.91<br>(1.81) | 26.94<br>(1.5)  | 24.38<br>(1.29) | 28.4<br>(1.17)  | 30.65<br>(1.27) | 26.27<br>(2.17) |
| DE.MV     | 43.37<br>(2.42) | 23.65<br>(3.64) | 24.75<br>(2.02) | 23.73<br>(1.73) | 21.9<br>(1.66)  | 29.67<br>(1.31) | 32.51<br>(1.43) | 20.42<br>(1.88) |
| DE.NI     | 36.79<br>(4.08) | 25.04<br>(1.52) | 31.14<br>(2.13) | 29.27<br>(1.9)  | 25.79<br>(1.55) | 26.6<br>(1.51)  | 28.37<br>(1.46) | 23.78<br>(1.43) |
| DE.NW     | 27.17<br>(1.82) | 30.11<br>(1.95) | 29.02<br>(1.76) | 26.88<br>(1.4)  | 23.81<br>(1.3)  | 24.03<br>(1.22) | 26.34<br>(1.3)  | 23.89<br>(1.39) |
| DE.RP     | 37.39<br>(1.95) | 28.08<br>(2.87) | 33.77<br>(2.98) | 30.08<br>(2.0)  | 27.61<br>(1.9)  | 29.65<br>(1.54) | 32.08<br>(1.52) | 25.21<br>(1.72) |
| DE.SH     | 40.16<br>(2.41) | 25.64<br>(3.5)  | 27.71<br>(2.11) | 24.92<br>(1.52) | 22.56<br>(1.4)  | 27.62<br>(1.3)  | 29.71<br>(1.38) | 22.11<br>(1.5)  |
| DE.SL     | 43.31<br>(2.36) | 29.46<br>(4.43) | 27.08<br>(1.94) | 25.34<br>(1.63) | 23.13<br>(1.55) | 29.71<br>(1.35) | 32.97<br>(1.36) | 25.14<br>(1.99) |
| DE.SN     | 37.25<br>(2.14) | 28.69<br>(2.68) | 33.36<br>(2.6)  | 29.02<br>(1.9)  | 32.1<br>(3.88)  | 30.92<br>(1.52) | 33.24<br>(1.61) | 25.23<br>(1.81) |
| DE.ST     | 41.44<br>(2.62) | 24.22<br>(2.71) | 28.74<br>(2.05) | 26.11<br>(1.63) | 25.81<br>(1.58) | 29.69<br>(1.34) | 33.07<br>(1.43) | 24.9<br>(2.89)  |
| DE.TH     | 36.35<br>(2.07) | 25.93<br>(2.62) | 32.59<br>(2.3)  | 29.07<br>(1.79) | 27.14<br>(1.83) | 29.28<br>(1.29) | 32.86<br>(1.43) | 23.49<br>(2.13) |

**Table S3.1.3:** Base models versus baseline ensemble methods for COVID-19 deaths in Germany. The performances are given as the mean MAPE and its standard error in parentheses. The regions are given in HASC Codes (<http://www.statoids.com/ihasc.html>).

| Geography | LR              | LSTM             | XG              | RF              | ARIMA           | Mean            | Median          | Prev.-Best      |
|-----------|-----------------|------------------|-----------------|-----------------|-----------------|-----------------|-----------------|-----------------|
| FR        | 20.71<br>(1.33) | 45.94<br>(4.46)  | 38.08<br>(3.44) | 33.89<br>(2.71) | 22.67<br>(1.89) | 28.63<br>(2.28) | 29.50<br>(2.42) | 23.01<br>(2.08) |
| FR.AC     | 24.38<br>(1.88) | 31.43<br>(2.18)  | 40.41<br>(4.81) | 37.92<br>(4.04) | 27.68<br>(2.67) | 29.75<br>(2.38) | 27.97<br>(2.0)  | 25.24<br>(2.01) |
| FR.AO     | 23.82<br>(1.52) | 29.23<br>(2.26)  | 39.81<br>(3.83) | 35.53<br>(2.97) | 25.28<br>(2.06) | 28.45<br>(2.07) | 27.2<br>(1.81)  | 22.8<br>(1.64)  |
| FR.AR     | 23.03<br>(1.6)  | 30.95<br>(2.15)  | 43.67<br>(4.16) | 39.63<br>(3.13) | 24.97<br>(1.94) | 29.7<br>(2.17)  | 28.66<br>(2.04) | 24.16<br>(1.69) |
| FR.BF     | 23.92<br>(1.47) | 37.13<br>(2.89)  | 43.82<br>(4.52) | 40.64<br>(4.0)  | 26.45<br>(2.04) | 31.58<br>(2.43) | 29.69<br>(1.99) | 24.23<br>(1.56) |
| FR.BT     | 23.93<br>(1.52) | 31.98<br>(2.59)  | 37.9<br>(4.14)  | 35.58<br>(3.51) | 26.37<br>(2.53) | 28.15<br>(2.35) | 27.25<br>(2.22) | 25.05<br>(2.0)  |
| FR.CE     | 30.93<br>(3.06) | 97.99<br>(42.98) | 45.09<br>(4.9)  | 39.91<br>(3.04) | 28.02<br>(2.27) | 43.79<br>(9.26) | 35.28<br>(2.67) | 32.07<br>(3.83) |
| FR.CN     | 23.18<br>(1.48) | 36.75<br>(2.94)  | 42.6<br>(5.77)  | 38.22<br>(5.37) | 27.33<br>(4.09) | 30.64<br>(3.01) | 28.2<br>(2.01)  | 24.26<br>(1.63) |
| FR.IF     | 20.71<br>(1.3)  | 29.75<br>(2.11)  | 35.7<br>(2.97)  | 31.07<br>(2.33) | 21.84<br>(2.06) | 24.52<br>(1.84) | 25.15<br>(1.96) | 20.05<br>(1.53) |
| FR.LP     | 22.65<br>(1.4)  | 30.01<br>(2.18)  | 43.24<br>(4.8)  | 38.56<br>(3.79) | 24.71<br>(2.34) | 28.87<br>(2.42) | 27.44<br>(2.14) | 23.38<br>(1.74) |
| FR.NC     | 23.16<br>(1.49) | 28.39<br>(2.09)  | 44.57<br>(5.77) | 38.66<br>(4.11) | 23.51<br>(1.98) | 28.7<br>(2.55)  | 26.8<br>(2.0)   | 23.86<br>(2.12) |
| FR.ND     | 22.96<br>(1.38) | 32.37<br>(2.36)  | 37.78<br>(3.32) | 33.16<br>(2.59) | 24.53<br>(2.15) | 26.6<br>(2.07)  | 25.96<br>(2.05) | 21.79<br>(1.43) |
| FR.PL     | 25.05<br>(1.7)  | 33.53<br>(2.59)  | 45.56<br>(6.55) | 41.66<br>(5.85) | 26.64<br>(2.72) | 31.14<br>(3.21) | 28.78<br>(2.46) | 26.55<br>(2.41) |
| FR.PR     | 20.14<br>(1.32) | 30.12<br>(2.24)  | 37.77<br>(3.3)  | 34.09<br>(2.47) | 21.82<br>(1.62) | 26.01<br>(1.86) | 25.56<br>(1.89) | 20.59<br>(1.48) |

**Table S3.1.4:** Base models versus baseline ensemble methods for COVID-19 cases in France. The performances are given as the mean MAPE and its standard error in parentheses. The regions are given in HASC Codes (<http://www.statoids.com/ihasc.html>).

| Geography | LR              | LSTM            | XG              | RF              | ARIMA           | Mean            | Median          | Prev.-Best      |
|-----------|-----------------|-----------------|-----------------|-----------------|-----------------|-----------------|-----------------|-----------------|
| FR        | 16.45<br>(1.01) | 33.61<br>(1.94) | 25.95<br>(1.66) | 24.26<br>(1.43) | 16.84<br>(1.05) | 20.43<br>(1.19) | 21.02<br>(1.22) | 17.57<br>(1.11) |
| FR.AC     | 27.27<br>(1.46) | 26.43<br>(1.45) | 29.44<br>(1.8)  | 27.52<br>(1.68) | 24.1<br>(1.4)   | 24.32<br>(1.33) | 25.34<br>(1.42) | 23.5<br>(1.42)  |
| FR.AO     | 25.34<br>(2.0)  | 26.66<br>(1.56) | 25.09<br>(1.62) | 23.33<br>(1.43) | 21.48<br>(1.36) | 21.48<br>(1.37) | 22.15<br>(1.37) | 20.66<br>(1.26) |
| FR.AR     | 23.62<br>(3.36) | 28.65<br>(1.78) | 27.74<br>(2.26) | 26.34<br>(1.92) | 21.73<br>(1.67) | 22.73<br>(1.93) | 23.48<br>(1.71) | 23.2<br>(3.33)  |
| FR.BF     | 28.99<br>(4.16) | 27.4<br>(1.48)  | 27.35<br>(1.85) | 25.06<br>(1.53) | 23.59<br>(1.34) | 23.42<br>(1.52) | 23.54<br>(1.29) | 22.64<br>(1.34) |
| FR.BT     | 27.55<br>(2.13) | 28.7<br>(1.89)  | 29.24<br>(2.07) | 26.89<br>(1.84) | 22.98<br>(1.36) | 23.79<br>(1.42) | 25.45<br>(1.58) | 24.84<br>(2.02) |
| FR.CE     | 47.12<br>(5.49) | 41.03<br>(5.01) | 34.56<br>(2.93) | 30.39<br>(2.24) | 29.47<br>(2.15) | 31.7<br>(2.3)   | 32.39<br>(1.71) | 39.67<br>(5.34) |
| FR.CN     | 34.41<br>(3.86) | 32.32<br>(2.37) | 33.6<br>(2.5)   | 30.9<br>(2.03)  | 26.98<br>(1.85) | 28.01<br>(2.05) | 28.83<br>(1.88) | 26.45<br>(1.75) |
| FR.IF     | 22.91<br>(1.71) | 28.58<br>(1.54) | 27.27<br>(1.88) | 25.55<br>(1.58) | 21.09<br>(1.31) | 22.55<br>(1.36) | 23.3<br>(1.38)  | 22.32<br>(1.72) |
| FR.LP     | 25.56<br>(2.83) | 26.26<br>(1.75) | 28.48<br>(1.85) | 26.71<br>(1.71) | 23.58<br>(1.53) | 23.27<br>(1.5)  | 25.18<br>(1.62) | 20.98<br>(1.25) |
| FR.NC     | 25.89<br>(2.58) | 26.89<br>(1.47) | 28.03<br>(2.01) | 25.21<br>(1.57) | 23.74<br>(1.39) | 23.15<br>(1.4)  | 23.63<br>(1.38) | 24.45<br>(2.32) |
| FR.ND     | 29.23<br>(1.87) | 31.09<br>(2.44) | 30.76<br>(1.9)  | 27.35<br>(1.61) | 25.8<br>(1.43)  | 24.7<br>(1.46)  | 25.69<br>(1.43) | 26.2<br>(1.61)  |
| FR.PL     | 22.93<br>(1.47) | 28.35<br>(1.95) | 28.12<br>(2.0)  | 25.96<br>(1.67) | 22.56<br>(1.41) | 22.53<br>(1.4)  | 23.39<br>(1.48) | 22.85<br>(1.45) |
| FR.PR     | 19.34<br>(1.19) | 25.51<br>(1.61) | 28.54<br>(2.0)  | 25.81<br>(1.52) | 19.21<br>(1.16) | 21.54<br>(1.23) | 22.49<br>(1.28) | 19.28<br>(1.1)  |

**Table S3.1.5:** Base models versus baseline ensemble methods for COVID-19 hospitalization in France. The performances are given as the mean MAPE and its standard error in parentheses. The regions are given in HASC Codes (<http://www.statoids.com/ihasc.html>).

| Geography | LR              | LSTM            | XG              | RF              | ARIMA           | Mean            | Median          | Prev.-Best      |
|-----------|-----------------|-----------------|-----------------|-----------------|-----------------|-----------------|-----------------|-----------------|
| FR        | 16.77<br>(1.35) | 30.63<br>(1.87) | 20.79<br>(1.27) | 19.32<br>(1.19) | 17.09<br>(1.12) | 17.07<br>(1.03) | 17.96<br>(1.10) | 16.70<br>(1.42) |
| FR.AC     | 36.32<br>(3.09) | 21.39<br>(1.29) | 27.0<br>(1.83)  | 24.52<br>(1.42) | 22.7<br>(1.41)  | 24.14<br>(1.33) | 24.92<br>(1.28) | 25.0<br>(1.65)  |
| FR.AO     | 31.27<br>(2.05) | 19.94<br>(1.14) | 24.87<br>(1.77) | 23.0<br>(1.51)  | 21.77<br>(1.23) | 21.43<br>(1.13) | 22.42<br>(1.17) | 22.87<br>(1.39) |
| FR.AR     | 28.14<br>(1.61) | 22.71<br>(1.48) | 26.66<br>(1.52) | 24.7<br>(1.46)  | 21.55<br>(1.22) | 21.68<br>(1.26) | 23.0<br>(1.4)   | 22.28<br>(1.34) |
| FR.BF     | 37.52<br>(3.51) | 20.13<br>(1.2)  | 26.11<br>(1.61) | 23.41<br>(1.29) | 21.63<br>(1.05) | 24.05<br>(1.26) | 25.71<br>(1.24) | 21.99<br>(1.2)  |
| FR.BT     | 35.44<br>(1.75) | 22.99<br>(2.16) | 27.96<br>(1.92) | 25.55<br>(1.45) | 23.57<br>(1.32) | 25.39<br>(1.2)  | 27.52<br>(1.27) | 24.32<br>(1.39) |
| FR.CE     | 46.49<br>(1.54) | 22.55<br>(5.19) | 21.96<br>(2.18) | 21.05<br>(1.78) | 18.39<br>(1.45) | 32.78<br>(1.19) | 40.17<br>(1.16) | 23.15<br>(5.13) |
| FR.CN     | 36.17<br>(1.87) | 22.12<br>(1.59) | 28.53<br>(2.14) | 25.19<br>(1.28) | 23.49<br>(1.31) | 23.51<br>(1.16) | 25.68<br>(1.24) | 22.81<br>(1.29) |
| FR.IF     | 27.36<br>(4.01) | 25.56<br>(1.71) | 24.24<br>(1.71) | 22.3<br>(1.48)  | 21.38<br>(1.41) | 20.83<br>(1.54) | 21.06<br>(1.31) | 23.3<br>(3.98)  |
| FR.LP     | 30.95<br>(1.72) | 23.38<br>(1.47) | 27.25<br>(1.74) | 25.96<br>(1.63) | 23.99<br>(1.34) | 23.99<br>(1.27) | 25.79<br>(1.36) | 22.29<br>(1.38) |
| FR.NC     | 37.14<br>(9.0)  | 20.58<br>(1.19) | 25.51<br>(2.16) | 23.4<br>(1.68)  | 21.94<br>(1.49) | 22.79<br>(2.36) | 21.52<br>(1.24) | 22.21<br>(1.16) |
| FR.ND     | 30.01<br>(1.54) | 21.44<br>(1.45) | 26.39<br>(1.65) | 22.82<br>(1.17) | 21.35<br>(1.05) | 22.35<br>(1.03) | 24.65<br>(1.14) | 22.76<br>(1.32) |
| FR.PL     | 32.14<br>(1.66) | 22.12<br>(2.04) | 24.14<br>(1.4)  | 22.48<br>(1.25) | 20.23<br>(1.07) | 23.4<br>(1.08)  | 25.71<br>(1.19) | 23.04<br>(1.34) |
| FR.PR     | 27.82<br>(1.89) | 22.21<br>(1.38) | 26.14<br>(1.67) | 22.98<br>(1.33) | 20.86<br>(1.35) | 21.69<br>(1.24) | 22.63<br>(1.3)  | 21.96<br>(1.47) |

**Table S3.1.6:** Base models versus baseline ensemble methods for COVID-19 deaths in France. The performances are given as the mean MAPE and its standard error in parentheses. The regions are given in HASC Codes (<http://www.statoids.com/ihasc.html>).

### 3.2 Baseline Ensembles versus Dynamic Model Stacking and Selection

| Geography                                       | LR              | LSTM            | XG              | RF              | ARIMA           | Mean            | Median          | Prev.-Best      | Selection       | Stacking        |
|-------------------------------------------------|-----------------|-----------------|-----------------|-----------------|-----------------|-----------------|-----------------|-----------------|-----------------|-----------------|
| <b>Daily COVID-19 Cases DE (N=28)</b>           |                 |                 |                 |                 |                 |                 |                 |                 |                 |                 |
| DE                                              | 19.04<br>(3.66) | 31.45<br>(4.05) | 34.37<br>(4.96) | 26.77<br>(3.23) | 23.63<br>(3.04) | 23.75<br>(2.51) | 24.40<br>(2.89) | 17.07<br>(2.38) | 28.94<br>(7.10) | 24.58<br>(2.41) |
| DE_reg                                          | 24.36<br>(3.42) | 28.84<br>(2.78) | 34.04<br>(4.22) | 29.31<br>(3.01) | 25.55<br>(2.89) | 25.58<br>(2.68) | 26.53<br>(2.80) | 22.50<br>(2.13) | 30.44<br>(3.59) | 26.29<br>(2.37) |
| <b>Daily COVID-19 Hospitalization DE (N=28)</b> |                 |                 |                 |                 |                 |                 |                 |                 |                 |                 |
| DE                                              | 15.80<br>(2.36) | 32.73<br>(4.36) | 25.37<br>(3.26) | 24.63<br>(2.88) | 9.77<br>(1.23)  | 18.84<br>(2.26) | 19.37<br>(2.68) | 12.25<br>(2.01) | 24.51<br>(3.38) | 14.32<br>(2.01) |
| DE_reg                                          | 21.63<br>(1.93) | 24.3<br>(2.01)  | 31.03<br>(3.40) | 27.85<br>(2.84) | 14.28<br>(1.24) | 20.88<br>(2.05) | 21.04<br>(1.77) | 17.47<br>(1.36) | 24.39<br>(2.16) | 19.68<br>(2.05) |
| <b>Daily COVID-19 Deaths DE (N=28)</b>          |                 |                 |                 |                 |                 |                 |                 |                 |                 |                 |
| DE                                              | 22.89<br>(3.34) | 41.30<br>(4.66) | 37.85<br>(5.64) | 32.63<br>(3.99) | 24.56<br>(2.96) | 25.98<br>(3.05) | 26.86<br>(3.15) | 24.87<br>(3.83) | 27.27<br>(4.57) | 21.99<br>(2.40) |
| DE_reg                                          | 37.80<br>(2.49) | 33.36<br>(4.96) | 39.46<br>(3.98) | 32.81<br>(2.53) | 28.79<br>(2.28) | 25.68<br>(1.17) | 26.63<br>(1.28) | 31.71<br>(1.78) | 34.59<br>(8.26) | 22.86<br>(2.70) |
| <b>Daily COVID-19 Cases FR (N=28)</b>           |                 |                 |                 |                 |                 |                 |                 |                 |                 |                 |
| FR                                              | 23.08<br>(2.50) | 37.84<br>(6.45) | 35.63<br>(6.79) | 32.28<br>(5.50) | 20.62<br>(3.36) | 25.13<br>(4.82) | 27.30<br>(5.12) | 21.53<br>(3.08) | 31.36<br>(8.19) | 20.48<br>(2.58) |
| FR_reg                                          | 24.73<br>(2.43) | 30.0<br>(5.45)  | 35.72<br>(6.22) | 33.26<br>(4.85) | 22.32<br>(3.46) | 26.2<br>(4.16)  | 26.75<br>(3.95) | 22.80<br>(2.90) | 28.79<br>(5.23) | 22.09<br>(2.46) |
| <b>Daily COVID-19 Hospitalization FR (N=28)</b> |                 |                 |                 |                 |                 |                 |                 |                 |                 |                 |
| FR                                              | 19.82<br>(2.08) | 39.23<br>(4.39) | 31.82<br>(3.71) | 27.27<br>(3.05) | 19.11<br>(1.92) | 23.36<br>(2.60) | 24.79<br>(2.62) | 21.35<br>(2.76) | 29.80<br>(5.04) | 17.60<br>(2.62) |
| FR_reg                                          | 28.09<br>(1.73) | 35.15<br>(3.59) | 34.75<br>(3.46) | 30.55<br>(2.50) | 26.16<br>(1.85) | 26.65<br>(1.99) | 27.28<br>(2.12) | 28.88<br>(2.09) | 32.53<br>(4.03) | 20.73<br>(1.82) |
| <b>Daily COVID-19 Deaths FR (N=28)</b>          |                 |                 |                 |                 |                 |                 |                 |                 |                 |                 |
| FR                                              | 18.20<br>(3.34) | 34.05<br>(4.66) | 22.82<br>(5.64) | 19.75<br>(3.99) | 19.43<br>(2.96) | 18.82<br>(3.05) | 18.61<br>(3.15) | 19.32<br>(3.83) | 21.06<br>(4.57) | 14.07<br>(2.40) |
| FR_reg                                          | 34.72<br>(2.49) | 24.83<br>(4.96) | 30.26<br>(3.98) | 26.47<br>(2.53) | 23.24<br>(2.28) | 23.09<br>(1.17) | 24.41<br>(1.28) | 26.76<br>(1.78) | 24.41<br>(8.26) | 17.99<br>(2.70) |
| <b>Weekly Influenza Cases DE (N=6)</b>          |                 |                 |                 |                 |                 |                 |                 |                 |                 |                 |
| DE                                              | 48.50<br>(1.08) | 4.20<br>(1.19)  | 2.67<br>(0.58)  | 4.86<br>(1.47)  | 2.82<br>(1.49)  | 36.51<br>(1.42) | 45.15<br>(1.58) | 10.87<br>(7.76) | 35.80<br>(8.17) | 7.82<br>(3.82)  |
| <b>Weekly SARI Hospitalization DE (N=16)</b>    |                 |                 |                 |                 |                 |                 |                 |                 |                 |                 |
| DE                                              | 19.87<br>(3.64) | 16.66<br>(3.0)  | 13.61<br>(3.74) | 14.21<br>(3.79) | 12.54<br>(3.45) | 12.89<br>(2.57) | 14.02<br>(3.26) | 15.15<br>(3.66) | 17.2<br>(2.64)  | 13.19<br>(3.12) |
| <b>Consensus Ranking</b>                        |                 |                 |                 |                 |                 |                 |                 |                 |                 |                 |
| All                                             | 6               | 7               | 9               | 8               | 2               | 4               | 5               | 2               | 3               | 1               |

|  |            |  |                |  |                |
|--|------------|--|----------------|--|----------------|
|  | Best Model |  | 2nd Best Model |  | 3rd Best Model |
|--|------------|--|----------------|--|----------------|

**Table S3.2.1:** Ensemble Model Pipeline Results. The performances are given as the mean MAPE and its standard error in parentheses of the N test windows for each dataset / dataset aggregation. The best three models are colored according to the provided legend. DE (FR) stands for German (France) country level and DE\_reg (FR\_reg) for German (France) regional level aggregated to country level.

|                   | ARIMA    | LR       | LSTM     | Mean     | Median   | Prev.-Best | RF       | Selection | Stacking |
|-------------------|----------|----------|----------|----------|----------|------------|----------|-----------|----------|
| <b>LR</b>         | 1.46E-15 | -        | -        | -        | -        | -          | -        | -         | -        |
| <b>LSTM</b>       | <1E-16   | 2.79E-01 | -        | -        | -        | -          | -        | -         | -        |
| <b>Mean</b>       | 3.52E-04 | 9.54E-05 | 8.24E-10 | -        | -        | -          | -        | -         | -        |
| <b>Median</b>     | 1.88E-08 | 6.27E-02 | 4.66E-05 | 2.79E-01 | -        | -          | -        | -         | -        |
| <b>Prev.-Best</b> | 1.94E-01 | 1.38E-08 | 4.23E-15 | 2.79E-01 | 1.95E-03 | -          | -        | -         | -        |
| <b>RF</b>         | <1E-16   | 4.97E-03 | 3.01E-01 | 4.14E-15 | 4.54E-09 | <1E-16     | -        | -         | -        |
| <b>Selection</b>  | 4.97E-03 | 1.01E-04 | 1.09E-09 | 6.30E-01 | 1.94E-01 | 3.24E-01   | 1.87E-14 | -         | -        |
| <b>Stacking</b>   | 5.74E-03 | <1E-16   | <1E-16   | 1.01E-13 | <1E-16   | 2.57E-07   | <1E-16   | 2.17E-10  | -        |
| <b>XG</b>         | <1E-16   | 1.17E-10 | 6.91E-06 | <1E-16   | <1E-16   | <1E-16     | 4.27E-03 | <1E-16    | <1E-16   |

**Table S3.2.2:** Base models versus baseline ensembles versus Dynamic Model Stacking and Selection approaches: pairwise Wilcox Test (adjusted p-values).



| Geography | LR              | LSTM            | XG              | RF              | ARIMA           | Mean            | Median          | Prev.-Best      | Selection        | Stacking        |
|-----------|-----------------|-----------------|-----------------|-----------------|-----------------|-----------------|-----------------|-----------------|------------------|-----------------|
| DE        | 19.04<br>(1.64) | 31.45<br>(1.81) | 34.37<br>(2.22) | 26.77<br>(1.45) | 23.63<br>(1.36) | 23.75<br>(1.12) | 24.4<br>(1.29)  | 17.07<br>(1.07) | 28.94<br>(7.1)   | 24.58<br>(2.41) |
| DE.BB     | 22.84<br>(1.53) | 24.65<br>(1.47) | 31.78<br>(2.27) | 27.87<br>(1.79) | 25.02<br>(1.73) | 23.73<br>(1.58) | 25.13<br>(1.62) | 22.08<br>(1.1)  | 31.01<br>(5.59)  | 26.39<br>(3.68) |
| DE.BE     | 27.51<br>(2.88) | 24.48<br>(1.15) | 26.61<br>(1.78) | 25.34<br>(1.56) | 24.48<br>(1.28) | 23.44<br>(1.33) | 22.76<br>(1.3)  | 19.32<br>(1.11) | 25.33<br>(6.48)  | 19.98<br>(2.6)  |
| DE.BW     | 25.49<br>(1.61) | 29.83<br>(2.0)  | 41.49<br>(3.05) | 36.51<br>(2.6)  | 29.53<br>(2.09) | 29.16<br>(1.94) | 30.74<br>(2.01) | 26.37<br>(1.73) | 29.4<br>(3.77)   | 30.99<br>(3.23) |
| DE.BY     | 26.52<br>(2.28) | 31.54<br>(2.11) | 38.93<br>(2.71) | 35.03<br>(2.2)  | 28.16<br>(1.78) | 29.34<br>(1.66) | 30.49<br>(1.85) | 26.81<br>(1.92) | 27.74<br>(4.23)  | 27.97<br>(3.14) |
| DE.HB     | 25.12<br>(2.16) | 43.76<br>(3.58) | 36.96<br>(3.16) | 28.16<br>(1.64) | 25.38<br>(1.43) | 28.81<br>(1.62) | 27.73<br>(1.56) | 22.52<br>(1.1)  | 43.13<br>(9.22)  | 30.99<br>(3.24) |
| DE.HE     | 20.03<br>(1.61) | 27.37<br>(1.6)  | 32.43<br>(1.91) | 29.1<br>(1.48)  | 24.63<br>(1.38) | 24.64<br>(1.21) | 26.52<br>(1.29) | 18.95<br>(1.15) | 24.38<br>(3.27)  | 24.19<br>(2.66) |
| DE.HH     | 20.51<br>(1.33) | 28.69<br>(1.81) | 26.91<br>(1.97) | 23.29<br>(1.42) | 21.06<br>(1.61) | 21.75<br>(1.41) | 22.19<br>(1.48) | 20.55<br>(1.5)  | 23.26<br>(3.39)  | 21.76<br>(2.64) |
| DE.MV     | 21.94<br>(1.68) | 24.02<br>(1.14) | 28.41<br>(1.97) | 22.36<br>(1.34) | 20.98<br>(1.34) | 21.2<br>(1.29)  | 21.64<br>(1.27) | 18.92<br>(1.06) | 35.92<br>(5.56)  | 28.9<br>(3.88)  |
| DE.NI     | 22.23<br>(2.05) | 24.0<br>(1.37)  | 30.06<br>(1.73) | 27.58<br>(1.26) | 24.13<br>(1.27) | 22.34<br>(1.16) | 24.54<br>(1.3)  | 20.09<br>(1.17) | 28.58<br>(4.57)  | 24.17<br>(2.83) |
| DE.NW     | 19.06<br>(1.53) | 20.66<br>(1.52) | 26.0<br>(1.67)  | 21.38<br>(1.36) | 21.48<br>(1.21) | 18.28<br>(1.14) | 20.0<br>(1.17)  | 19.45<br>(1.47) | 25.28<br>(4.11)  | 22.64<br>(2.4)  |
| DE.RP     | 30.86<br>(2.66) | 32.39<br>(1.81) | 39.39<br>(2.71) | 34.31<br>(2.25) | 30.74<br>(2.2)  | 30.19<br>(2.1)  | 30.69<br>(2.25) | 26.17<br>(2.15) | 26.7<br>(3.89)   | 25.45<br>(3.16) |
| DE.SH     | 22.43<br>(1.96) | 22.96<br>(1.3)  | 30.04<br>(1.93) | 26.78<br>(1.36) | 25.7<br>(1.5)   | 22.89<br>(1.33) | 25.45<br>(1.44) | 20.82<br>(1.86) | 31.46<br>(4.65)  | 26.85<br>(3.02) |
| DE.SL     | 29.98<br>(3.08) | 40.37<br>(2.48) | 49.73<br>(4.07) | 41.86<br>(3.14) | 30.66<br>(2.62) | 35.1<br>(2.55)  | 35.26<br>(2.68) | 23.77<br>(1.58) | 57.54<br>(18.31) | 36.84<br>(6.57) |
| DE.SN     | 23.17<br>(1.83) | 26.02<br>(1.41) | 33.39<br>(2.12) | 29.4<br>(1.53)  | 24.68<br>(1.61) | 24.78<br>(1.42) | 25.89<br>(1.46) | 22.22<br>(1.36) | 25.82<br>(4.54)  | 23.72<br>(3.1)  |
| DE.ST     | 27.81<br>(2.11) | 28.36<br>(1.59) | 34.65<br>(2.31) | 29.61<br>(1.88) | 26.5<br>(1.6)   | 26.72<br>(1.65) | 28.03<br>(1.64) | 26.04<br>(1.7)  | 24.41<br>(3.71)  | 24.76<br>(3.6)  |
| DE.TH     | 24.3<br>(1.87)  | 32.31<br>(1.69) | 37.79<br>(2.88) | 30.42<br>(1.95) | 25.61<br>(1.61) | 26.94<br>(1.64) | 27.49<br>(1.63) | 25.88<br>(1.96) | 27.05<br>(5.1)   | 25.0<br>(3.76)  |

**Table S3.2.3:** Base models versus baseline ensemble methods versus Dynamic Stacking and Selection for COVID-19 cases in Germany. The performances are given as the mean MAPE and its standard error in parentheses. The regions are given in HASC Codes (<http://www.statoids.com/ihasc.html>).

| Geography | LR              | LSTM            | XG              | RF              | ARIMA           | Mean            | Median          | Prev.-Best      | Selection       | Stacking         |
|-----------|-----------------|-----------------|-----------------|-----------------|-----------------|-----------------|-----------------|-----------------|-----------------|------------------|
| DE        | 15.8<br>(1.06)  | 32.73<br>(1.96) | 25.37<br>(1.47) | 24.63<br>(1.3)  | 9.77<br>(0.55)  | 18.84<br>(1.02) | 19.37<br>(1.21) | 12.25<br>(0.91) | 24.51<br>(3.83) | 14.32<br>(2.01)  |
| DE.BB     | 20.25<br>(1.15) | 20.52<br>(1.18) | 31.42<br>(1.72) | 26.98<br>(1.7)  | 12.72<br>(0.76) | 19.85<br>(1.15) | 19.58<br>(1.11) | 13.49<br>(0.72) | 33.5<br>(5.31)  | 22.5<br>(3.23)   |
| DE.BE     | 20.26<br>(1.06) | 17.04<br>(1.36) | 25.41<br>(1.39) | 22.9<br>(1.31)  | 11.91<br>(0.85) | 16.66<br>(1.05) | 16.11<br>(1.08) | 16.01<br>(1.05) | 18.93<br>(3.7)  | 15.11<br>(2.36)  |
| DE.BW     | 19.36<br>(1.33) | 24.69<br>(1.19) | 32.17<br>(1.95) | 28.34<br>(1.92) | 12.94<br>(0.7)  | 20.66<br>(1.3)  | 22.2<br>(1.29)  | 15.74<br>(0.96) | 21.83<br>(2.29) | 15.25<br>(1.77)  |
| DE.BY     | 18.93<br>(1.39) | 24.99<br>(1.12) | 29.51<br>(2.16) | 26.29<br>(1.92) | 10.94<br>(0.68) | 19.37<br>(1.3)  | 19.65<br>(1.24) | 14.01<br>(0.89) | 20.15<br>(3.01) | 15.27<br>(1.92)  |
| DE.HB     | 37.6<br>(2.64)  | 43.87<br>(2.88) | 49.32<br>(3.86) | 44.51<br>(3.45) | 24.88<br>(1.87) | 34.88<br>(2.42) | 35.91<br>(2.4)  | 33.31<br>(2.0)  | 24.31<br>(3.1)  | 25.99<br>(2.98)  |
| DE.HE     | 15.69<br>(1.23) | 22.95<br>(1.13) | 29.29<br>(2.03) | 27.51<br>(1.9)  | 10.94<br>(0.62) | 19.47<br>(1.23) | 19.54<br>(1.12) | 11.19<br>(0.63) | 20.83<br>(3.77) | 15.04<br>(1.46)  |
| DE.HH     | 26.68<br>(1.78) | 28.9<br>(1.86)  | 30.64<br>(2.14) | 28.79<br>(1.97) | 18.3<br>(1.22)  | 23.07<br>(1.62) | 23.33<br>(1.68) | 20.97<br>(1.51) | 21.95<br>(2.73) | 21.22<br>(4.99)  |
| DE.MV     | 17.29<br>(1.13) | 23.25<br>(1.57) | 26.78<br>(1.96) | 23.08<br>(1.34) | 12.61<br>(0.78) | 17.71<br>(1.2)  | 18.46<br>(1.18) | 14.4<br>(0.88)  | 29.35<br>(4.57) | 28.87<br>(6.62)  |
| DE.NI     | 17.58<br>(1.01) | 20.6<br>(0.97)  | 26.57<br>(1.56) | 24.49<br>(1.67) | 11.98<br>(0.69) | 18.33<br>(0.94) | 18.58<br>(0.9)  | 12.08<br>(0.84) | 20.44<br>(3.45) | 15.78<br>(2.3)   |
| DE.NW     | 14.68<br>(0.98) | 21.5<br>(1.25)  | 20.65<br>(1.33) | 20.44<br>(1.27) | 10.2<br>(0.6)   | 16.3<br>(0.83)  | 16.6<br>(0.92)  | 12.58<br>(0.9)  | 21.91<br>(3.27) | 12.3<br>(1.88)   |
| DE.RP     | 19.89<br>(1.72) | 23.54<br>(1.31) | 30.34<br>(2.08) | 25.88<br>(1.87) | 14.61<br>(0.97) | 19.83<br>(1.36) | 18.95<br>(1.38) | 16.61<br>(1.23) | 21.1<br>(3.5)   | 15.89<br>(2.28)  |
| DE.SH     | 19.73<br>(0.92) | 19.61<br>(1.35) | 23.51<br>(1.18) | 21.49<br>(1.17) | 15.96<br>(1.07) | 16.75<br>(0.95) | 16.81<br>(0.9)  | 16.56<br>(0.96) | 23.82<br>(4.2)  | 19.09<br>(2.76)  |
| DE.SL     | 30.53<br>(1.85) | 28.27<br>(1.34) | 46.54<br>(3.6)  | 42.85<br>(3.31) | 20.53<br>(1.16) | 28.49<br>(2.1)  | 28.33<br>(1.7)  | 26.45<br>(1.35) | 40.21<br>(6.97) | 35.86<br>(11.74) |
| DE.SN     | 21.97<br>(1.34) | 23.37<br>(1.22) | 30.85<br>(2.0)  | 27.19<br>(1.74) | 13.04<br>(0.85) | 20.63<br>(1.21) | 20.59<br>(1.09) | 17.91<br>(1.15) | 25.92<br>(3.26) | 19.88<br>(2.78)  |
| DE.ST     | 22.5<br>(1.65)  | 22.09<br>(1.38) | 34.47<br>(2.45) | 28.84<br>(1.27) | 13.02<br>(0.74) | 22.14<br>(1.14) | 21.21<br>(1.07) | 15.39<br>(0.78) | 26.53<br>(3.32) | 21.03<br>(3.58)  |
| DE.TH     | 23.15<br>(1.06) | 23.55<br>(1.29) | 29.07<br>(1.51) | 26.09<br>(1.25) | 13.94<br>(0.93) | 19.89<br>(1.08) | 20.71<br>(1.08) | 22.75<br>(1.34) | 19.38<br>(2.62) | 15.75<br>(1.33)  |

**Table S3.2.4:** Base models versus baseline ensemble methods versus Dynamic Stacking and Selection for COVID-19 hospitalization in Germany. The performances are given as the mean MAPE and its standard error in parentheses. The regions are given in HASC Codes (<http://www.statoids.com/ihasc.html>).

| Geography | LR              | LSTM            | XG              | RF              | ARIMA           | Mean            | Median          | Prev.-Best      | Selection        | Stacking         |
|-----------|-----------------|-----------------|-----------------|-----------------|-----------------|-----------------|-----------------|-----------------|------------------|------------------|
| DE        | 22.89<br>(1.51) | 41.3<br>(2.1)   | 37.85<br>(2.54) | 32.63<br>(1.8)  | 24.56<br>(1.33) | 25.98<br>(1.37) | 26.86<br>(1.42) | 24.87<br>(1.72) | 27.27<br>(4.57)  | 21.99<br>(2.4)   |
| DE.BB     | 31.56<br>(1.65) | 29.1<br>(3.29)  | 35.55<br>(2.28) | 29.2<br>(1.61)  | 26.49<br>(1.57) | 21.75<br>(1.02) | 21.08<br>(1.02) | 27.95<br>(1.54) | 32.73<br>(12.23) | 17.97<br>(2.98)  |
| DE.BE     | 47.34<br>(5.1)  | 31.41<br>(2.0)  | 42.25<br>(3.41) | 33.58<br>(2.6)  | 30.33<br>(2.18) | 26.13<br>(2.12) | 26.97<br>(1.52) | 33.41<br>(2.2)  | 39.17<br>(13.46) | 22.57<br>(5.5)   |
| DE.BW     | 31.83<br>(2.03) | 30.89<br>(1.59) | 44.74<br>(2.99) | 38.67<br>(2.15) | 30.49<br>(1.75) | 27.33<br>(1.44) | 28.61<br>(1.51) | 36.22<br>(2.34) | 30.33<br>(4.94)  | 23.97<br>(3.75)  |
| DE.BY     | 35.03<br>(1.8)  | 32.45<br>(1.67) | 41.84<br>(2.79) | 35.86<br>(2.46) | 29.74<br>(1.37) | 27.79<br>(1.57) | 28.75<br>(1.53) | 33.28<br>(2.01) | 35.18<br>(5.7)   | 25.0<br>(2.9)    |
| DE.HB     | 39.88<br>(1.32) | 41.62<br>(5.47) | 27.5<br>(1.81)  | 23.41<br>(1.09) | 19.86<br>(0.85) | 25.93<br>(0.99) | 33.02<br>(1.11) | 22.08<br>(1.18) | 42.29<br>(21.99) | 40.06<br>(22.01) |
| DE.HE     | 34.43<br>(3.44) | 31.5<br>(2.31)  | 44.97<br>(3.33) | 34.39<br>(2.48) | 31.53<br>(2.07) | 26.88<br>(1.58) | 25.92<br>(1.64) | 36.48<br>(3.41) | 26.28<br>(4.66)  | 21.67<br>(2.61)  |
| DE.HH     | 41.6<br>(2.76)  | 33.14<br>(3.0)  | 41.7<br>(1.73)  | 33.44<br>(1.48) | 27.62<br>(1.24) | 23.47<br>(1.07) | 23.43<br>(1.15) | 33.41<br>(1.7)  | 33.51<br>(9.38)  | 18.01<br>(2.29)  |
| DE.MV     | 38.46<br>(1.52) | 34.83<br>(4.63) | 34.35<br>(2.16) | 31.04<br>(1.75) | 27.44<br>(1.57) | 23.92<br>(1.16) | 25.38<br>(1.18) | 27.37<br>(1.74) | 36.69<br>(13.73) | 16.52<br>(1.86)  |
| DE.NI     | 25.99<br>(1.42) | 30.13<br>(1.38) | 40.55<br>(2.35) | 36.73<br>(1.93) | 28.83<br>(1.74) | 25.69<br>(1.38) | 27.65<br>(1.46) | 25.75<br>(0.92) | 26.95<br>(4.24)  | 24.35<br>(2.86)  |
| DE.NW     | 26.69<br>(1.55) | 31.23<br>(1.86) | 32.16<br>(2.29) | 29.26<br>(1.72) | 27.1<br>(1.72)  | 24.78<br>(1.33) | 25.83<br>(1.45) | 27.97<br>(1.56) | 24.14<br>(3.5)   | 23.02<br>(2.8)   |
| DE.RP     | 43.54<br>(2.48) | 34.68<br>(2.2)  | 51.48<br>(5.04) | 39.73<br>(2.6)  | 37.0<br>(2.45)  | 31.45<br>(1.86) | 31.55<br>(1.57) | 38.29<br>(2.44) | 37.63<br>(10.46) | 23.05<br>(3.23)  |
| DE.SH     | 33.2<br>(1.77)  | 29.81<br>(3.5)  | 33.04<br>(1.81) | 27.57<br>(1.31) | 25.41<br>(1.41) | 21.05<br>(0.98) | 21.29<br>(1.02) | 27.53<br>(1.31) | 35.71<br>(11.34) | 19.36<br>(2.42)  |
| DE.SL     | 43.55<br>(2.12) | 37.24<br>(3.47) | 36.64<br>(1.65) | 31.7<br>(1.49)  | 29.38<br>(1.24) | 24.83<br>(1.18) | 27.39<br>(1.35) | 39.45<br>(2.38) | 52.87<br>(19.98) | 29.35<br>(7.34)  |
| DE.SN     | 45.04<br>(2.21) | 33.82<br>(3.24) | 44.3<br>(2.79)  | 33.52<br>(2.14) | 31.6<br>(1.9)   | 27.37<br>(1.3)  | 25.93<br>(1.35) | 31.22<br>(1.99) | 35.55<br>(5.54)  | 25.23<br>(3.19)  |
| DE.ST     | 48.73<br>(4.48) | 37.95<br>(3.18) | 42.06<br>(2.72) | 35.48<br>(1.92) | 30.82<br>(1.41) | 29.35<br>(1.27) | 29.01<br>(1.08) | 38.54<br>(4.14) | 31.8<br>(9.82)   | 18.1<br>(2.58)   |
| DE.TH     | 37.97<br>(3.35) | 34.02<br>(3.45) | 38.19<br>(2.79) | 31.37<br>(2.17) | 27.04<br>(2.31) | 23.19<br>(1.41) | 24.19<br>(1.37) | 28.47<br>(1.51) | 32.63<br>(8.87)  | 17.47<br>(1.95)  |

**Table S3.2.5:** Base models versus baseline ensemble methods versus Dynamic Stacking and Selection for COVID-19 deaths in Germany. The performances are given as the mean MAPE and its standard error in parentheses. The regions are given in HASC Codes (<http://www.statoids.com/ihasc.html>).

| Geography | LR              | LSTM            | XG              | RF              | ARIMA           | Mean            | Median          | Prev.-Best      | Selection        | Stacking        |
|-----------|-----------------|-----------------|-----------------|-----------------|-----------------|-----------------|-----------------|-----------------|------------------|-----------------|
| FR        | 23.08<br>(1.13) | 37.84<br>(2.9)  | 35.63<br>(3.06) | 32.28<br>(2.48) | 20.62<br>(1.51) | 25.13<br>(2.17) | 27.3<br>(2.31)  | 21.53<br>(1.39) | 31.36<br>(8.19)  | 20.48<br>(2.58) |
| FR.AC     | 22.86<br>(1.37) | 28.36<br>(2.16) | 35.61<br>(3.18) | 32.44<br>(2.74) | 22.8<br>(1.76)  | 25.91<br>(1.96) | 27.18<br>(2.05) | 25.48<br>(1.85) | 21.91<br>(3.66)  | 23.27<br>(3.09) |
| FR.AO     | 27.57<br>(1.59) | 31.28<br>(3.14) | 37.88<br>(2.99) | 31.9<br>(2.29)  | 27.05<br>(2.86) | 28.43<br>(2.22) | 28.88<br>(1.98) | 21.69<br>(1.71) | 21.35<br>(3.21)  | 22.31<br>(2.94) |
| FR.AR     | 22.1<br>(1.22)  | 27.71<br>(2.02) | 37.92<br>(3.12) | 35.87<br>(2.62) | 21.29<br>(1.56) | 25.75<br>(1.93) | 26.69<br>(1.72) | 22.77<br>(2.08) | 31.07<br>(11.45) | 21.48<br>(2.7)  |
| FR.BF     | 24.82<br>(1.31) | 34.58<br>(3.4)  | 36.91<br>(2.99) | 34.3<br>(2.62)  | 22.87<br>(1.79) | 28.09<br>(2.18) | 28.12<br>(2.0)  | 23.69<br>(1.31) | 33.82<br>(9.05)  | 23.61<br>(2.81) |
| FR.BT     | 26.24<br>(1.77) | 27.8<br>(2.66)  | 32.46<br>(3.13) | 31.47<br>(2.67) | 22.87<br>(2.0)  | 25.35<br>(2.27) | 26.76<br>(2.4)  | 24.28<br>(2.48) | 24.49<br>(3.54)  | 24.15<br>(3.16) |
| FR.CE     | 28.57<br>(1.61) | 34.59<br>(2.94) | 30.94<br>(1.87) | 30.42<br>(1.63) | 24.61<br>(1.16) | 27.03<br>(1.42) | 26.8<br>(1.3)   | 21.35<br>(1.25) | 46.22<br>(18.99) | 20.95<br>(2.68) |
| FR.CN     | 25.53<br>(1.6)  | 37.25<br>(3.86) | 38.57<br>(3.19) | 32.51<br>(2.14) | 22.08<br>(1.91) | 27.95<br>(2.36) | 28.7<br>(1.96)  | 25.29<br>(1.83) | 40.39<br>(18.19) | 23.8<br>(2.87)  |
| FR.IF     | 23.16<br>(1.17) | 28.82<br>(1.62) | 31.75<br>(2.56) | 30.18<br>(2.06) | 17.07<br>(1.23) | 22.3<br>(1.58)  | 22.89<br>(1.47) | 20.28<br>(1.53) | 25.1<br>(7.38)   | 18.26<br>(2.66) |
| FR.LP     | 23.82<br>(1.17) | 27.07<br>(2.34) | 37.3<br>(3.79)  | 35.46<br>(2.85) | 22.77<br>(1.63) | 25.77<br>(2.2)  | 26.5<br>(2.24)  | 19.31<br>(1.04) | 31.89<br>(8.31)  | 25.28<br>(3.05) |
| FR.NC     | 23.45<br>(1.26) | 28.08<br>(2.26) | 39.53<br>(2.87) | 36.54<br>(2.24) | 19.24<br>(1.31) | 26.54<br>(1.74) | 27.35<br>(1.78) | 23.51<br>(1.8)  | 21.82<br>(2.96)  | 19.17<br>(2.7)  |
| FR.ND     | 24.79<br>(1.31) | 30.63<br>(3.12) | 31.05<br>(2.45) | 30.32<br>(2.22) | 20.94<br>(1.56) | 24.31<br>(1.97) | 24.11<br>(1.77) | 20.37<br>(1.19) | 22.31<br>(2.55)  | 21.47<br>(2.41) |
| FR.PL     | 27.68<br>(1.63) | 30.42<br>(3.15) | 41.9<br>(3.74)  | 37.66<br>(3.07) | 25.7 (2.1)      | 29.86<br>(2.49) | 30.33<br>(2.76) | 29.28<br>(2.89) | 31.82<br>(6.5)   | 23.97<br>(3.62) |
| FR.PR     | 20.86<br>(0.92) | 23.34<br>(1.99) | 32.6<br>(3.08)  | 33.33<br>(2.87) | 20.83<br>(1.42) | 23.33<br>(1.87) | 23.41<br>(1.79) | 19.15<br>(1.0)  | 22.08<br>(4.36)  | 19.49<br>(2.99) |

**Table S3.2.6:** Base models versus baseline ensemble methods versus Dynamic Stacking and Selection for COVID-19 cases in France. The performances are given as the mean MAPE and its standard error in parentheses. The regions are given in HASC Codes (<http://www.statoids.com/ihasc.html>).

| Geography | LR              | LSTM            | XG              | RF              | ARIMA           | Mean            | Median          | Prev.-Best      | Selection       | Stacking        |
|-----------|-----------------|-----------------|-----------------|-----------------|-----------------|-----------------|-----------------|-----------------|-----------------|-----------------|
| FR        | 19.82<br>(0.94) | 39.23<br>(1.98) | 31.82<br>(1.67) | 27.27<br>(1.37) | 19.11<br>(0.87) | 23.36<br>(1.17) | 24.79<br>(1.18) | 21.35<br>(1.24) | 29.8<br>(5.04)  | 17.6<br>(2.62)  |
| FR.AC     | 26.93<br>(1.11) | 29.22<br>(1.57) | 30.47<br>(1.8)  | 27.46<br>(1.55) | 25.73<br>(1.47) | 25.24<br>(1.35) | 26.86<br>(1.39) | 26.62<br>(1.37) | 31.44<br>(3.79) | 22.11<br>(2.59) |
| FR.AO     | 31.33<br>(2.15) | 33.94<br>(1.56) | 34.6<br>(1.98)  | 29.67<br>(1.63) | 25.2<br>(1.27)  | 27.52<br>(1.48) | 27.71<br>(1.61) | 26.16<br>(1.28) | 29.16<br>(5.45) | 19.07<br>(3.24) |
| FR.AR     | 21.28<br>(0.86) | 29.06<br>(1.52) | 30.2<br>(1.79)  | 26.16<br>(1.48) | 22.55<br>(1.2)  | 21.48<br>(1.26) | 22.67<br>(1.27) | 21.87<br>(1.15) | 44.8<br>(15.82) | 27.44<br>(7.47) |
| FR.BF     | 27.77<br>(1.58) | 37.09<br>(1.93) | 33.8<br>(1.68)  | 29.88<br>(1.32) | 27.85<br>(1.28) | 27.21<br>(1.36) | 28.27<br>(1.36) | 29.35<br>(1.22) | 25.18<br>(3.23) | 16.78<br>(2.13) |
| FR.BT     | 22.95<br>(1.26) | 31.91<br>(1.45) | 29.17<br>(1.5)  | 24.07<br>(1.09) | 23.12<br>(0.97) | 22.44<br>(1.06) | 22.7<br>(1.04)  | 24.79<br>(1.16) | 32.33<br>(5.95) | 19.18<br>(2.71) |
| FR.CE     | 49.35<br>(4.19) | 56.3<br>(8.82)  | 37.98<br>(2.66) | 34.32<br>(2.2)  | 32.88<br>(2.29) | 31.1<br>(2.07)  | 28.63<br>(1.52) | 57.67<br>(9.35) | 37.55<br>(6.77) | 22.0<br>(3.69)  |
| FR.CN     | 27.52<br>(1.81) | 45.15<br>(2.77) | 43.26<br>(3.05) | 37.56<br>(2.57) | 32.71<br>(2.05) | 32.81<br>(2.01) | 34.26<br>(2.22) | 29.7<br>(1.6)   | 51.9<br>(16.04) | 27.35<br>(5.58) |
| FR.IF     | 24.74<br>(1.19) | 32.18<br>(1.84) | 32.44<br>(1.96) | 29.46<br>(1.55) | 23.21<br>(1.55) | 24.91<br>(1.46) | 26.33<br>(1.51) | 25.97<br>(1.29) | 30.03<br>(7.64) | 20.14<br>(3.41) |
| FR.LP     | 24.94<br>(1.59) | 25.22<br>(1.72) | 32.0<br>(2.19)  | 27.87<br>(1.81) | 24.6<br>(1.46)  | 24.06<br>(1.56) | 25.42<br>(1.59) | 24.65<br>(1.33) | 25.03<br>(2.95) | 18.22<br>(2.44) |
| FR.NC     | 32.06<br>(2.71) | 33.64<br>(1.85) | 38.17<br>(2.22) | 31.11<br>(1.71) | 26.4<br>(1.6)   | 29.04<br>(1.73) | 28.57<br>(1.63) | 27.83<br>(1.77) | 33.01<br>(6.47) | 20.32<br>(3.1)  |
| FR.ND     | 27.76<br>(1.49) | 38.9<br>(2.09)  | 38.79<br>(2.35) | 35.5<br>(1.97)  | 29.54<br>(1.49) | 29.11<br>(1.57) | 30.34<br>(1.56) | 30.7<br>(1.71)  | 32.27<br>(4.47) | 21.51<br>(2.97) |
| FR.PL     | 28.19<br>(2.08) | 39.62<br>(2.86) | 36.85<br>(2.87) | 33.1<br>(2.32)  | 26.45<br>(1.9)  | 28.03<br>(1.97) | 29.2<br>(2.13)  | 30.52<br>(2.17) | 26.19<br>(3.53) | 18.28<br>(2.23) |
| FR.PR     | 20.36<br>(1.05) | 24.77<br>(1.53) | 34.01<br>(2.15) | 31.05<br>(1.87) | 19.89<br>(0.92) | 23.46<br>(1.21) | 23.72<br>(1.3)  | 19.59<br>(0.96) | 23.95<br>(3.25) | 17.07<br>(2.09) |

**Table S3.2.6:** Base models versus baseline ensemble methods versus Dynamic Stacking and Selection for COVID-19 hospitalization in France. The performances are given as the mean MAPE and its standard error in parentheses. The regions are given in HASC Codes (<http://www.statoids.com/ihasc.html>).

| Geography | LR              | LSTM            | XG              | RF              | ARIMA           | Mean            | Median          | Prev.-Best      | Selection        | Stacking        |
|-----------|-----------------|-----------------|-----------------|-----------------|-----------------|-----------------|-----------------|-----------------|------------------|-----------------|
| FR        | 18.2<br>(0.99)  | 34.05<br>(2.05) | 22.82<br>(1.23) | 19.75<br>(1.1)  | 19.43<br>(0.99) | 18.82<br>(1.05) | 18.61<br>(1.04) | 19.32<br>(1.57) | 21.06<br>(4.95)  | 14.07<br>(2.17) |
| FR.AC     | 31.28<br>(1.55) | 21.54<br>(1.18) | 29.78<br>(1.64) | 25.2<br>(1.11)  | 23.3<br>(1.04)  | 20.57<br>(0.92) | 20.77<br>(0.96) | 28.05<br>(1.58) | 20.01<br>(2.48)  | 18.86<br>(2.28) |
| FR.AO     | 30.23<br>(1.9)  | 23.39<br>(1.52) | 30.44<br>(2.23) | 26.21<br>(1.89) | 22.35<br>(1.54) | 21.99<br>(1.23) | 21.63<br>(1.21) | 26.34<br>(1.83) | 32.1<br>(5.93)   | 22.11<br>(2.93) |
| FR.AR     | 28.83<br>(1.46) | 23.43<br>(1.22) | 28.63<br>(1.6)  | 26.58<br>(1.41) | 21.44<br>(0.94) | 19.88<br>(0.9)  | 19.84<br>(0.91) | 27.61<br>(1.28) | 26.16<br>(4.96)  | 17.51<br>(2.32) |
| FR.BF     | 37.07<br>(1.53) | 23.99<br>(1.25) | 28.17<br>(2.16) | 21.63<br>(1.23) | 20.06<br>(0.91) | 21.22<br>(0.97) | 22.04<br>(0.97) | 24.61<br>(1.52) | 18.4<br>(2.5)    | 14.72<br>(1.64) |
| FR.BT     | 42.02<br>(2.38) | 25.54<br>(1.66) | 38.2<br>(3.19)  | 32.51<br>(2.17) | 30.21<br>(1.78) | 27.89<br>(1.32) | 30.13<br>(1.17) | 33.76<br>(1.87) | 22.77<br>(5.22)  | 15.76<br>(1.93) |
| FR.CE     | 43.29<br>(1.42) | 21.38<br>(2.4)  | 19.1<br>(1.16)  | 16.98<br>(0.85) | 15.55<br>(0.69) | 30.4<br>(1.0)   | 40.05<br>(1.02) | 18.44<br>(1.24) | 27.3<br>(5.67)   | 17.7<br>(5.11)  |
| FR.CN     | 42.54<br>(2.15) | 31.12<br>(2.25) | 34.5<br>(1.71)  | 33.35<br>(1.37) | 27.6<br>(1.53)  | 24.56<br>(1.29) | 24.86<br>(1.31) | 31.63<br>(1.56) | 21.47<br>(4.27)  | 18.46<br>(2.75) |
| FR.IF     | 29.9<br>(1.73)  | 25.68<br>(1.75) | 31.41<br>(2.06) | 28.14<br>(1.74) | 25.36<br>(1.85) | 22.38<br>(1.28) | 22.6<br>(1.25)  | 26.55<br>(1.8)  | 38.71<br>(18.74) | 17.9<br>(2.27)  |
| FR.LP     | 29.88<br>(1.8)  | 23.77<br>(1.55) | 29.72<br>(2.22) | 28.24<br>(1.92) | 23.07<br>(1.3)  | 22.53<br>(1.2)  | 23.69<br>(1.17) | 23.92<br>(1.4)  | 20.84<br>(2.14)  | 18.28<br>(1.59) |
| FR.NC     | 37.4<br>(3.57)  | 23.19<br>(1.36) | 27.61<br>(1.64) | 26.34<br>(1.63) | 22.79<br>(1.34) | 22.72<br>(1.54) | 21.58<br>(1.12) | 26.03<br>(1.37) | 27.17<br>(8.1)   | 18.89<br>(2.46) |
| FR.ND     | 27.8<br>(1.38)  | 26.05<br>(2.34) | 31.1<br>(1.87)  | 24.12<br>(1.3)  | 20.67<br>(1.09) | 19.5<br>(0.79)  | 22.22<br>(0.95) | 24.67<br>(1.44) | 21.09<br>(3.15)  | 17.66<br>(2.64) |
| FR.PL     | 36.77<br>(1.84) | 30.86<br>(2.29) | 32.71<br>(2.04) | 28.92<br>(1.71) | 26.13<br>(1.37) | 24.41<br>(1.09) | 26.3<br>(1.15)  | 29.25<br>(1.72) | 20.58<br>(4.09)  | 19.57<br>(4.1)  |
| FR.PR     | 34.34<br>(2.44) | 22.89<br>(1.14) | 31.98<br>(1.92) | 25.94<br>(1.48) | 23.57<br>(1.48) | 22.2<br>(1.24)  | 21.65<br>(1.2)  | 26.98<br>(1.42) | 20.74<br>(2.77)  | 16.42<br>(2.15) |

**Table S3.2.6:** Base models versus baseline ensemble methods versus Dynamic Stacking and Selection for COVID-19 deaths in France. The performances are given as the mean MAPE and its standard error in parentheses. The regions are given in HASC Codes (<http://www.statoids.com/ihasc.html>).

### S3.3 Potential Benefits of Including Metadata

| Geography | Selection        | Stacking        | Sel. Meta        | Stack. Meta     |
|-----------|------------------|-----------------|------------------|-----------------|
| DE        | 28.94<br>(7.1)   | 24.58<br>(2.41) | 40.23<br>(8.68)  | 22.26<br>(2.26) |
| DE.BB     | 31.01<br>(5.59)  | 26.39<br>(3.68) | 37.45<br>(7.08)  | 26.38<br>(3.26) |
| DE.BE     | 25.33<br>(6.48)  | 19.98<br>(2.6)  | 32.77<br>(6.5)   | 19.45<br>(2.38) |
| DE.BW     | 29.4<br>(3.77)   | 30.99<br>(3.23) | 35.88<br>(6.36)  | 30.7<br>(2.85)  |
| DE.BY     | 27.74<br>(4.23)  | 27.97<br>(3.14) | 32.92<br>(5.48)  | 27.8<br>(3.14)  |
| DE.HB     | 43.13<br>(9.22)  | 30.99<br>(3.24) | 49.68<br>(9.28)  | 26.74<br>(2.86) |
| DE.HE     | 24.38<br>(3.27)  | 24.19<br>(2.66) | 30.68<br>(5.09)  | 24.06<br>(2.43) |
| DE.HH     | 23.26<br>(3.39)  | 21.76<br>(2.64) | 28.35<br>(4.1)   | 19.57<br>(2.36) |
| DE.MV     | 35.92<br>(5.56)  | 28.9<br>(3.88)  | 44.27<br>(8.04)  | 27.85<br>(5.04) |
| DE.NI     | 28.58<br>(4.57)  | 24.17<br>(2.83) | 31.95<br>(5.3)   | 22.97<br>(2.4)  |
| DE.NW     | 25.28<br>(4.11)  | 22.64<br>(2.4)  | 29.01<br>(4.99)  | 20.97<br>(2.28) |
| DE.RP     | 26.7<br>(3.89)   | 25.45<br>(3.16) | 34.62<br>(5.16)  | 24.73<br>(2.54) |
| DE.SH     | 31.46<br>(4.65)  | 26.85<br>(3.02) | 39.83<br>(6.29)  | 26.82<br>(3.45) |
| DE.SL     | 57.54<br>(18.31) | 36.84<br>(6.57) | 65.95<br>(18.62) | 35.64<br>(5.47) |
| DE.SN     | 25.82<br>(4.54)  | 23.72<br>(3.1)  | 35.72<br>(5.39)  | 24.76<br>(2.94) |
| DE.ST     | 24.41<br>(3.71)  | 24.76<br>(3.6)  | 35.04<br>(6.14)  | 24.73<br>(3.39) |
| DE.TH     | 27.05<br>(5.1)   | 25.0<br>(3.76)  | 35.39<br>(6.72)  | 25.29<br>(3.82) |

**Table S3.3.1:** Comparison of Dynamic Selection and Dynamic Stacking with and without the inclusion of metadata for COVID-19 Cases in Germany. The performances are given as the mean MAPE and its standard error in parentheses. The regions are given in HASC Codes (<http://www.statoids.com/ihasc.html>).

| Geography | Selection       | Stacking         | Sel. Meta          | Stack. Meta     |
|-----------|-----------------|------------------|--------------------|-----------------|
| DE        | 24.51<br>(3.83) | 14.32<br>(2.01)  | 24.07<br>(7.19)    | 14.49<br>(1.98) |
| DE.BB     | 33.5<br>(5.31)  | 22.5<br>(3.23)   | 36.56<br>(8.09)    | 22.12<br>(3.21) |
| DE.BE     | 18.93<br>(3.7)  | 15.11<br>(2.36)  | 31.14<br>(9.04)    | 14.81<br>(2.51) |
| DE.BW     | 21.83<br>(2.29) | 15.25<br>(1.77)  | 22.38<br>(3.57)    | 15.57<br>(1.77) |
| DE.BY     | 20.15<br>(3.01) | 15.27<br>(1.92)  | 18.89<br>(4.06)    | 15.41<br>(1.93) |
| DE.HB     | 24.31<br>(3.1)  | 25.99<br>(2.98)  | 141.83<br>(104.28) | 24.87<br>(2.77) |
| DE.HE     | 20.83<br>(3.77) | 15.04<br>(1.46)  | 19.91<br>(4.37)    | 14.99<br>(1.52) |
| DE.HH     | 21.95<br>(2.73) | 21.22<br>(4.99)  | 40.2<br>(10.86)    | 21.54<br>(5.03) |
| DE.MV     | 29.35<br>(4.57) | 28.87<br>(6.62)  | 42.39<br>(8.83)    | 28.61<br>(6.56) |
| DE.NI     | 20.44<br>(3.45) | 15.78<br>(2.3)   | 25.19<br>(4.58)    | 15.93<br>(2.3)  |
| DE.NW     | 21.91<br>(3.27) | 12.3<br>(1.88)   | 14.62<br>(2.86)    | 12.53<br>(1.89) |
| DE.RP     | 21.1<br>(3.5)   | 15.89<br>(2.28)  | 41.27<br>(16.28)   | 16.12<br>(2.29) |
| DE.SH     | 23.82<br>(4.2)  | 19.09<br>(2.76)  | 34.29<br>(8.59)    | 18.41<br>(2.79) |
| DE.SL     | 40.21<br>(6.97) | 35.86<br>(11.74) | 91.74<br>(28.2)    | 35.52<br>(9.8)  |
| DE.SN     | 25.92<br>(3.26) | 19.88<br>(2.78)  | 34.07<br>(6.84)    | 18.98<br>(2.59) |
| DE.ST     | 26.53<br>(3.32) | 21.03<br>(3.58)  | 34.59<br>(8.05)    | 19.55<br>(2.85) |
| DE.TH     | 19.38<br>(2.62) | 15.75<br>(1.33)  | 31.67<br>(6.03)    | 15.42<br>(1.29) |

**Table S3.3.2:** Comparison of Dynamic Selection and Dynamic Stacking with and without the inclusion of metadata for COVID-19 Hospitalization in Germany. The performances are given as the mean MAPE and its standard error in parentheses. The regions are given in HASC Codes (<http://www.statoids.com/ihasc.html>).



| Geography | Selection        | Stacking         | Sel. Meta        | Stack. Meta      |
|-----------|------------------|------------------|------------------|------------------|
| DE        | 27.27<br>(4.57)  | 21.99<br>(2.4)   | 33.68<br>(5.27)  | 29.49<br>(3.86)  |
| DE.BB     | 32.73<br>(12.23) | 17.97<br>(2.98)  | 37.21<br>(12.16) | 20.63<br>(3.09)  |
| DE.BE     | 39.17<br>(13.46) | 22.57<br>(5.5)   | 49.69<br>(13.77) | 19.57<br>(2.23)  |
| DE.BW     | 30.33<br>(4.94)  | 23.97<br>(3.75)  | 34.81<br>(5.15)  | 23.67<br>(3.04)  |
| DE.BY     | 35.18<br>(5.7)   | 25.0<br>(2.9)    | 39.83<br>(5.95)  | 23.03<br>(2.88)  |
| DE.HB     | 42.29<br>(21.99) | 40.06<br>(22.01) | 44.38<br>(21.93) | 40.03<br>(22.04) |
| DE.HE     | 26.28<br>(4.66)  | 21.67<br>(2.61)  | 31.86<br>(5.13)  | 21.78<br>(2.91)  |
| DE.HH     | 33.51<br>(9.38)  | 18.01<br>(2.29)  | 34.83<br>(9.31)  | 15.59<br>(1.46)  |
| DE.MV     | 36.69<br>(13.73) | 16.52<br>(1.86)  | 34.66<br>(13.73) | 17.08<br>(1.93)  |
| DE.NI     | 26.95<br>(4.24)  | 24.35<br>(2.86)  | 30.24<br>(4.73)  | 24.67<br>(2.62)  |
| DE.NW     | 24.14<br>(3.5)   | 23.02<br>(2.8)   | 32.09<br>(5.09)  | 21.7<br>(2.83)   |
| DE.RP     | 37.63<br>(10.46) | 23.05<br>(3.23)  | 43.44<br>(10.56) | 21.37<br>(2.31)  |
| DE.SH     | 35.71<br>(11.34) | 19.36<br>(2.42)  | 37.15<br>(11.3)  | 18.99<br>(2.31)  |
| DE.SL     | 52.87<br>(19.98) | 29.35<br>(7.34)  | 58.06<br>(19.75) | 25.66<br>(3.91)  |
| DE.SN     | 35.55<br>(5.54)  | 25.23<br>(3.19)  | 40.86<br>(7.02)  | 25.74<br>(3.29)  |
| DE.ST     | 31.8<br>(9.82)   | 18.1<br>(2.58)   | 38.86<br>(10.8)  | 16.18<br>(1.69)  |
| DE.TH     | 32.63<br>(8.87)  | 17.47<br>(1.95)  | 36.91<br>(8.91)  | 18.01<br>(2.02)  |

**Table S3.3.1:** Comparison of Dynamic Selection and Dynamic Stacking with and without the inclusion of metadata for COVID-19 Deaths in Germany. The performances are given as the mean MAPE and its standard error in parentheses. The regions are given in HASC Codes (<http://www.statoids.com/ihasc.html>).
