# Supplementary material for: A dynamic ensemble model for short-term forecasting in pandemic situations
Source: bioRxiv or medRxiv preprint supplement (doi:10.1101/2024.03.08.24303963), 2024-03-12
Supplement: Supplementary file [file media-1.zip]

| Model            | Hyperparameter                                                                                                                                                  | Search Space                                                                                                                                               | Sampler     |
|------------------|-----------------------------------------------------------------------------------------------------------------------------------------------------------------|------------------------------------------------------------------------------------------------------------------------------------------------------------|-------------|
| Random Forest    | Min_samples_split<br>Min_samples_leaf                                                                                                                           | [2,4,8,16]<br>[1,2,4]                                                                                                                                      | Grid-Search |
| XGBoost          | Learning rate<br>Max_depth<br>Reg_lambda<br>Reg_alpha                                                                                                           | (0.01,0.5)<br>(2,12)<br>(0,10)<br>(0,10)                                                                                                                   | TPE         |
| LSTM             | Learning rate<br>Batch size<br>Hidden state dim.<br># Hidden layers<br>Droprate                                                                                 | [0.001,0.005,0.01,0.05,0.1]<br>[16,32,64,128]<br>[16,32,64,128]<br>[1,2,3]<br>[0.0,0.2,0.5]                                                                | TPE         |
| Meta-Model       | Learning rate<br>Batch size<br># Hidden layers<br>Hidden state dim.                                                                                             | [0.001,0.005,0.01,0.05,0.1]<br>[16,32,64,128]<br>[0,1,2]<br>[8,16,32]                                                                                      | Grid Search |
| Meta-Model+LSTM* | Lookback Window<br>Learning rate<br>Batch size<br># Hidden layers<br>Hidden state dim.<br>Learning rate*<br>Hidden state dim.*<br># Hidden layers*<br>Droprate* | [2,3,4]<br>[0.001,0.005,0.01,0.05,0.1]<br>[16,32,64,128]<br>[0,1,2]<br>[8,16,32]<br>[0.001,0.005,0.01,0.05,0.1]<br>[4,8,16,32]<br>[1,2,3]<br>[0.0,0.2,0.5] | TPE         |

**Table S1: Hyperparameters for base models and meta-models.** The brackets correspond to discrete values, while the parentheses correspond to continuous parameter ranges. Hyperparameters denoted by a star belong to the LSTM model. The lookback window refers to the metadata. Hyperparameters were either optimized by using a grid-search or with a tree-structured Parzen estimator from optuna. As the base model’s hyperparameters were tuned for each fitting window and dataset and the meta-model’s hyperparameter for each dataset, we did not provide the final choices.
